# Supplementary material for: N-doped porous hard-carbon derived from recycled separators for efficient lithium-ion and sodium-ion batteries
Source: Royal Society of Chemistry journal article supplement (doi:10.1039/c8se00590g), 2019-01-01
Supplement: c8se00590g1.pdf [file c8se00590g1.pdf]

**Supplementary Information  
for**

**Porous N-doped Hard-Carbon Derived from Waste Separators for  
Efficient Lithium-Ion and Sodium-Ion Batteries**

Yong Wang,<sup>a</sup> Yong Li,<sup>b,a</sup> Samuel S. Mao,<sup>d</sup> Daixin Ye,<sup>e\*</sup> Wen Liu,<sup>a</sup> Rui Guo,<sup>a</sup> Zhenhe Feng,<sup>a</sup> Jilie Kong,<sup>b</sup>  
Jingying Xie<sup>a,c\*</sup>

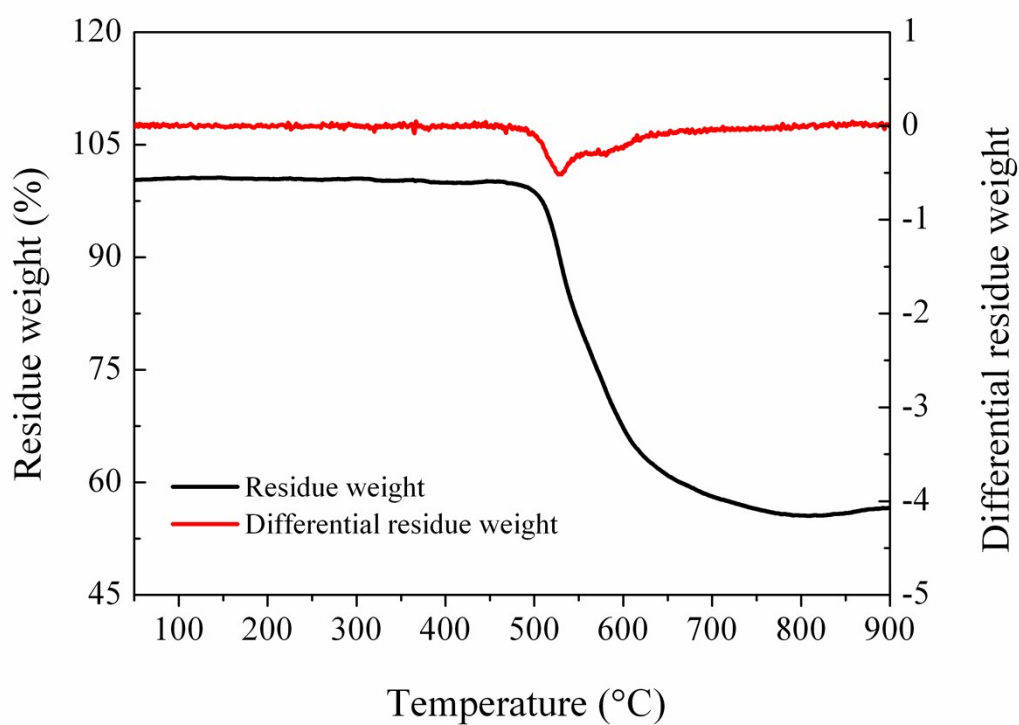

Supplementary Figure 1: TG curve of the precursor.

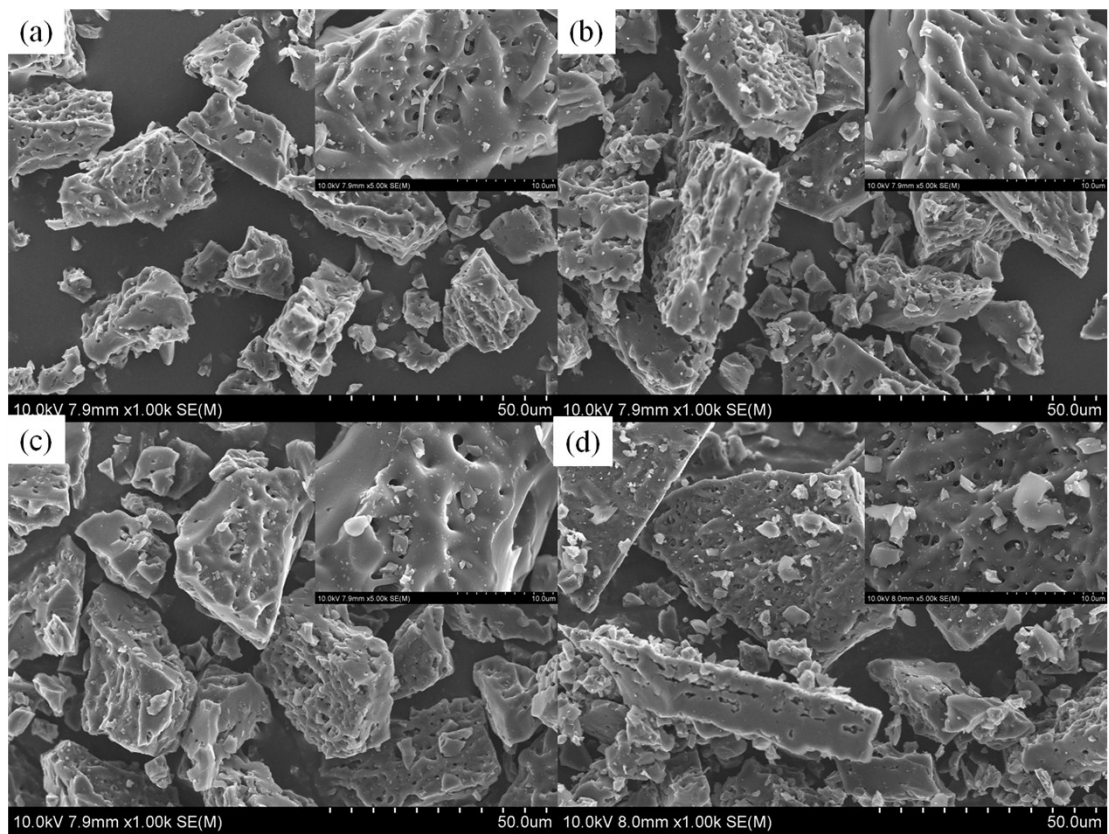

Supplementary Figure 2: SEM images of HC-800 (a); HC-1000 (b); HC-1100 (c) and HC-1300(d)

Supplementary Table 1: BET surface area and pore volume of the samples tested by N<sub>2</sub> adsorption/desorption

| Sample        | Surface Area (m <sup>2</sup> g <sup>-1</sup> ) | Pore Volume (cm <sup>3</sup> g <sup>-1</sup> ) |
|---------------|------------------------------------------------|------------------------------------------------|
| HC-800        | 405.4966                                       | 0.195817                                       |
| HC-900        | 398.3485                                       | 0.193779                                       |
| HC-1000       | 213.2200                                       | 0.130613                                       |
| HC-1100       | 8.1924                                         | 0.057399                                       |
| HC-1300       | 1.3459                                         | 0.015570                                       |
| Commercial HC | 0.1762                                         | 0.002274                                       |

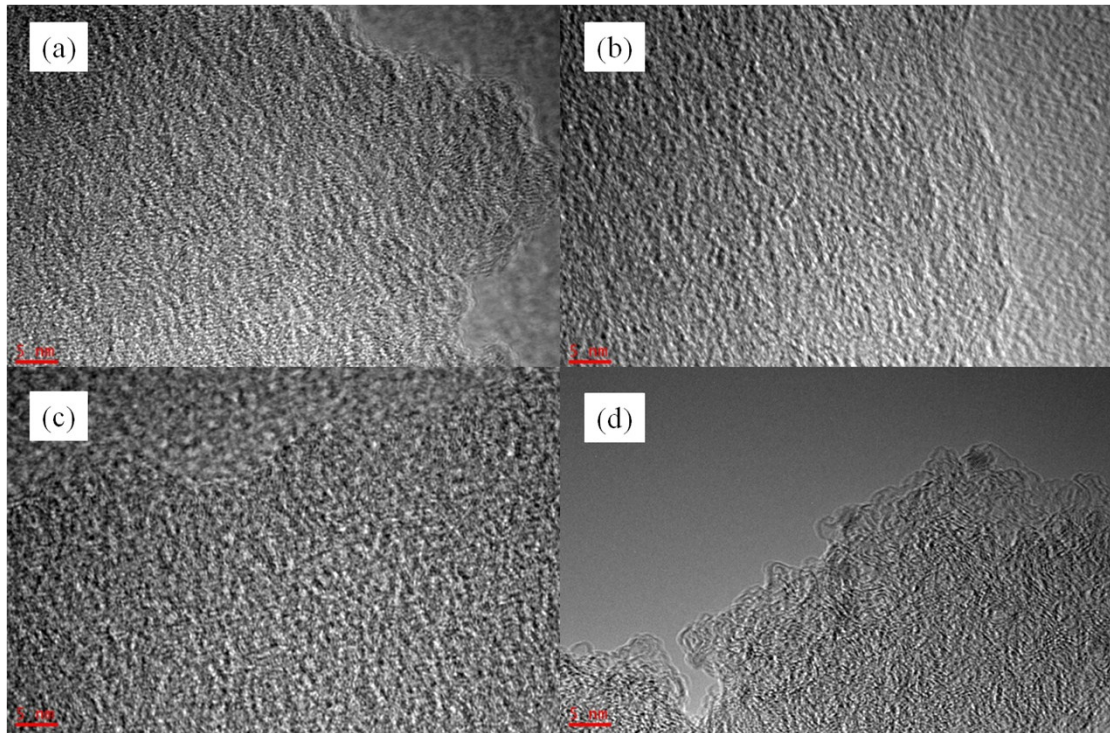

Supplementary Figure 3: TEM images of HC-800 (a); HC-1000 (b); HC-1100 (c) and HC-1300(d)

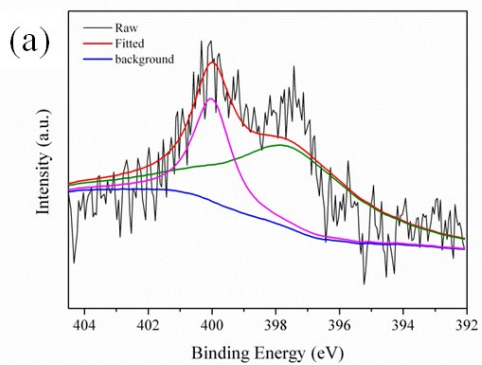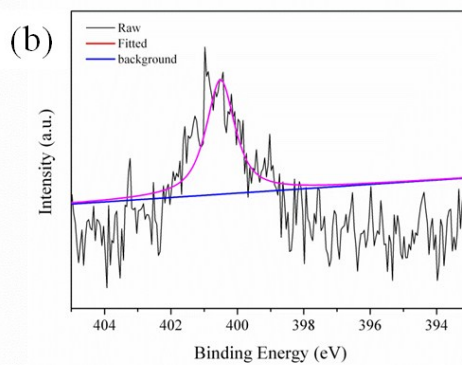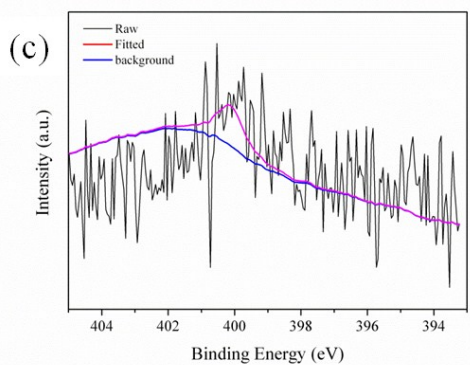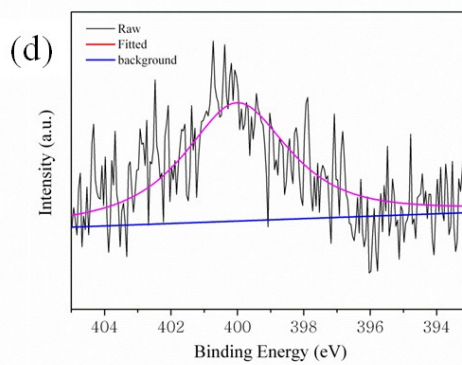

Supplementary Figure 4: N 1s spectra of HC-800 (a); HC-1000 (b); HC-1100 (c) and HC-1300(d)

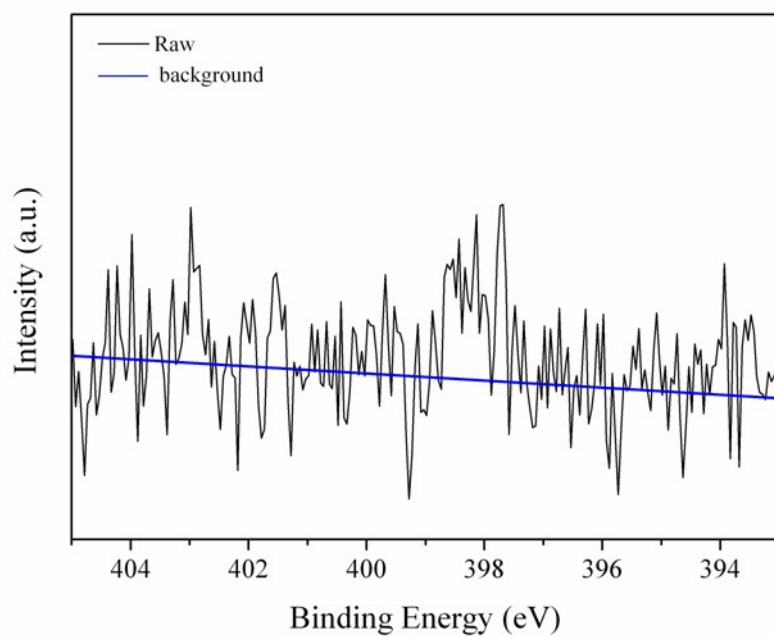

Supplementary Figure 5: N 1s spectrum of commercial hard carbon.

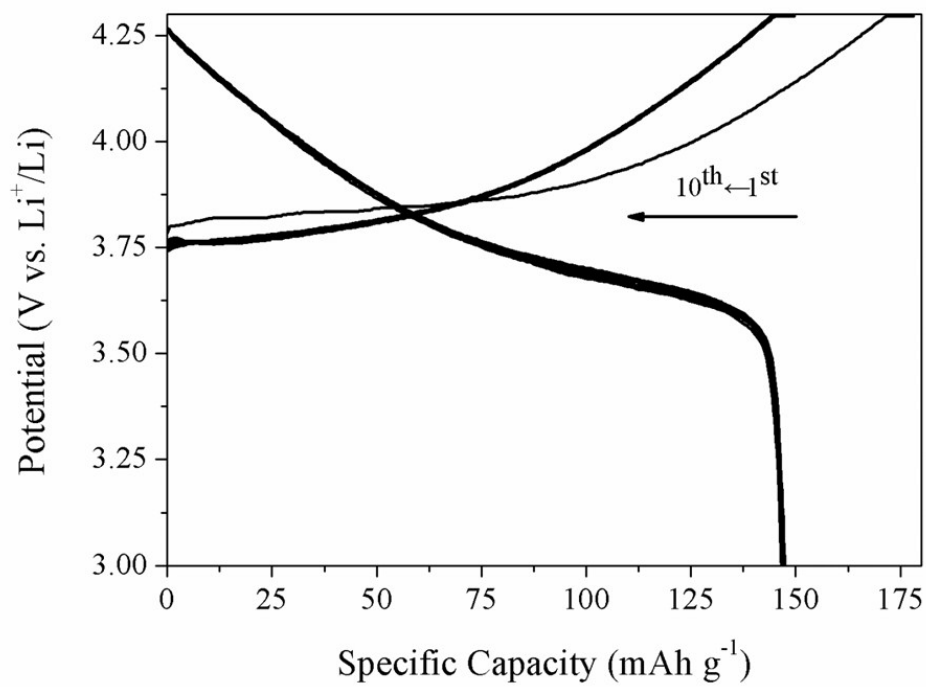

Supplementary Figure 6: Charge-discharge curves of first 10 cycles of  $\text{LiNi}_{1/3}\text{Co}_{1/3}\text{Mn}_{1/3}\text{O}_2//\text{Li}$  half cell

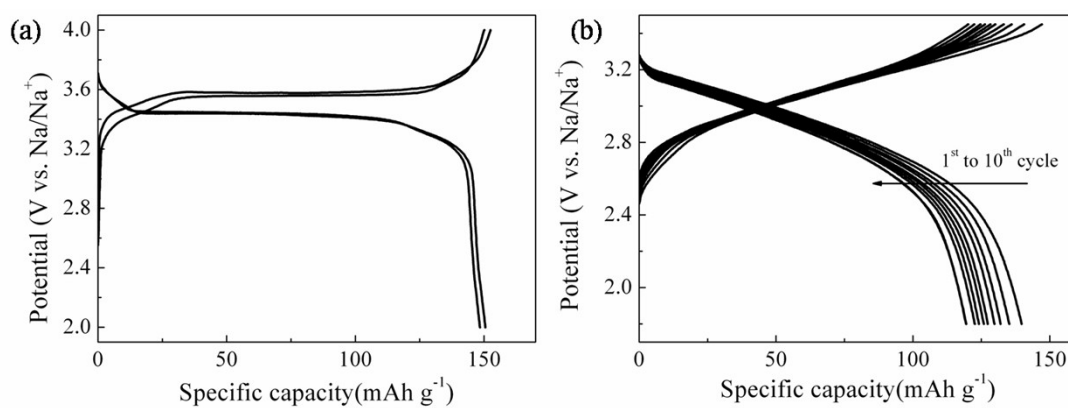

Supplementary Figure 7: Charge-discharge curves of (a) first 2 cycles of  $\text{Na}_{2-\delta}\text{MnHCF//Na}$  half cell and (b) first 10 cycles of  $\text{Na}_{2-\delta}\text{MnHCF//HC-900}$  full cell.
